# Supplementary material
Source: PubMed Central journal article supplement (PMC3486244)
Supplement: JCM.01625-12_zjm999092012so1.pdf [file JCM.01625-12_zjm999092012so1.pdf]

**SUPPLEMENTARY TABLE**

| Group                             | Target                               | Oligo Name                                   | Sequence                                       | Reference Genbank Accession        | Reference  |
|-----------------------------------|--------------------------------------|----------------------------------------------|------------------------------------------------|------------------------------------|------------|
| Controls                          | <i>nuc</i>                           | nucSb                                        | 511-GCGATTGATGGTGATACGGTT-531                  | V01281                             | (2)        |
|                                   |                                      | nucAp                                        | 558-CATTGGTTGACCTTTGTACATTAA-535               | V01281                             | (2)        |
|                                   |                                      | nucSp                                        | 745-GATGGAAAATGGTAAACGAAG-766                  | V01281                             | (2)        |
|                                   | <i>mecA</i>                          | nucAb                                        | 789-AGCCAAGCCTTGACGAATAAAGC-766                | V01281                             | (2)        |
|                                   |                                      | mecAP4b                                      | 1190-TCCAGATTACAACCTCACCAGG-1211               | Y00688                             | (3)        |
|                                   |                                      | mecAAp                                       | 1264-CTAATGTTTTGTTATTTAACCCAATCAT-1237         | Y00688                             | This study |
|                                   |                                      | mecASp                                       | 1288-GATGGTAAAGGTTGGCAAAA-1308                 | Y00688                             | This study |
| mecAP7b                           | 1357-CATTACCACCTTCATATCTGTAAACG-1332 | Y00688                                       | (3)                                            |                                    |            |
| Toxin Genes                       | <i>sea</i>                           | seaSb                                        | 487-CCTTTGGAAACGGTTAAAACG-507                  | M18970                             | (2)        |
|                                   |                                      | seaSp                                        | 531-GGAGTTGGATCTTCAAGCAAGACG-554               | M18970                             | (2)        |
|                                   |                                      | seaAp                                        | 613-TCTGAACCTTCCCATCAAAAAC-592                 | M18970                             | (2)        |
|                                   | <i>sec</i>                           | seaAb                                        | 691-TTGA ATACTGTCCTTGAGCACC-670                | M18970                             | (2)        |
|                                   |                                      | secSb                                        | 814-GATAAGTTTGACCAATCTAAATATTTAATG-843         | X05815                             | This study |
|                                   |                                      | secAp                                        | 866-ACCGTTTTATTGTCGTTGTACAT-844                | X05815                             | This study |
|                                   |                                      | secSp                                        | 889-GAAGTCCACCTTACAACAAAGAAT-912               | X05815                             | This study |
|                                   | <i>sed</i>                           | secAb                                        | 935-TCAAAATCGGATTAACATTATCC-913                | X05815                             | (2)        |
|                                   |                                      | sedSb                                        | 332-CTAGTTTGGTAATATCTCCTTTAAACG-358            | M28521                             | (2)        |
|                                   |                                      | sedAp                                        | 384-TGAATCAATGTTTTCAATGGC-364                  | M28521                             | This study |
|                                   | <i>lukS-PVL</i>                      | sedSp                                        | 385-GTAAAAGAGAAAGAATTGCATAAAAAAT-412           | M28521                             | This study |
|                                   |                                      | sedAb                                        | 462-ATCTGCATAAGAATGTTTCATATTATTAG-433          | M28521                             | This study |
|                                   |                                      | pvlSb                                        | 2651-TTTAGGCTCAAGACAAAGCAAC-2673               | X72700                             | (2)        |
|                                   |                                      | pvlAp                                        | 2731-TACCTCTGGATAAACAAGGCAATTTT-2707           | X72700                             | (2)        |
|                                   | Tn554tnpB                            | N046Sb                                       | pvlSp                                          | 2733-CTTCAATCCAGAATTTATTGGTGT-2756 | X72700     |
| pvlAb                             |                                      |                                              | 2783-TTTCAGCGTTTTGTTTCG-2764                   | X72700                             | (2)        |
| N046Sb                            |                                      |                                              | 2031-TGCTTCAATTTCCACTCTCG-2012                 | X03216                             | This study |
| N046Ap                            |                                      |                                              | 1987-CAAGTTCAGAGAGTACACCAATTA-2011             | X03216                             | This study |
| N046Sp                            |                                      | N046Sb                                       | 1948-GTCTTTGGGCAATATCACTTACATA-1924            | X03216                             | This study |
|                                   |                                      | N046Ab                                       | 1904-TGAACGTGGATAGCTTTCC-1923                  | X03216                             | This study |
| φMu50B SAV0881                    |                                      | SAV0881Sb                                    | 932269-TGCTTGTGTCATATCGCC-932287               | BA000017                           | (3)        |
|                                   |                                      | SAV0881Ap                                    | 932316-TGTTTTGGTAACTAGCCACTGTATAGATA-932288    | BA000017                           | (3)        |
|                                   |                                      | SAV0881Sp                                    | 932418-TCAAATTTCTTTTGAATAGTAAAGTCAGA-932446    | BA000017                           | (3)        |
| φPV83 ORF 2                       |                                      | SAV0881Ab                                    | 932468-CCTAGCTGTATGTCTGCGCTA-932447            | BA000017                           | (3)        |
|                                   |                                      | PV83ORF2Sb                                   | 1269-GGCGCTTCTTCTTACAGGAG-1288                 | AB044554                           | (3)        |
|                                   |                                      | PV83ORF2Ap                                   | 1323-CATTGTAGATATTTATATGGTATGTAACCTAAAA-1289   | AB044554                           | (3)        |
|                                   |                                      | PV83ORF2An                                   | 1356-GATAATCTGTTTTTTCACTAACTAAACCTAT-1324      | AB044554                           | (3)        |
|                                   |                                      | PV83ORF2Sn                                   | 1625-TGTTAATAACAACGGTAAACCAGTATTT-1653         | AB044554                           | (3)        |
|                                   |                                      | PV83ORF2Sp                                   | 1654-ATAGTTATTAAGACTTTGAAAACAGAATCATT-1686     | AB044554                           | (3)        |
| φMu50B SAV0858                    | PV83ORF2Ab                           | 1715-GAATTATAGGTTTTAAGTTCACCTCTTC-1687       | AB044554                                       | (3)                                |            |
|                                   | SAV0858Sb                            | 6334-ATCTAAATGCCTGTCGAAGC-6314               | AP001553                                       | (3)                                |            |
|                                   | SAV0858Ap                            | 6294-TATTTGCGGCTTTAGCGTAA-6313               | AP001553                                       | (3)                                |            |
|                                   | SAV0858An                            | 6266-GCGTTCATAACATACGAATTATTCAT-6291         | AP001553                                       | This study                         |            |
|                                   | SAV0858Sn                            | 6084-GAAGTCCGCAAAGTTAGCACT-6064              | AP001553                                       | This study                         |            |
|                                   | SAV0858Sp                            | 6063-CATTGAGAAAGTCTTTGTCGATACT-6037          | AP001553                                       | (3)                                |            |
| Phage-derived open reading frames | SAV0858Ab                            | 6017-CCAAGAACAGGACATCGAC-6036                | AP001553                                       | (3)                                |            |
|                                   | φ11 nt 4427-5251                     | phi11-4563Sb                                 | 4563-GATATGCAAGATCAGACAATGCC-4585              | AF424781                           | (3)        |
|                                   |                                      | phi11-4610Ap                                 | 4610-CCTCGCTATCAACATGATTTCTAAT-4586            | AF424781                           | (3)        |
|                                   |                                      | phi11-4632An                                 | 4632-CTAAATTTGTCGTCAGTTTGT-4611                | AF424781                           | (3)        |
|                                   |                                      | phi11-5026Sn                                 | 5026-CAAACCTACTACAGCAAGCTAGACTACAAC-5054       | AF424781                           | (3)        |
|                                   | phi11-5055Sp                         | 5055-GAAAAGTAAATAAACAGTGGGTGCTTTA-5082       | AF424781                                       | (3)                                |            |
|                                   | phi11-5103Ab                         | 5103-CTCTGCCCATGTGTTCTGAG-5083               | AF424781                                       | (3)                                |            |
| φSLT ORF 257                      | SLTorf257Sb                          | 26802-GTGTATCGCTATGAGTGGTGAC-26824           | EF462198                                       | (3)                                |            |
|                                   | SLTorf257Ap                          | 26855-TTAAAAAATATTTTTGTGCATAAAAAATAGT-26825  | EF462198                                       | (3)                                |            |
|                                   | SLTorf257An                          | 26880-GTCATAACCCATGAATTATGAATCA-26856        | EF462198                                       | This study                         |            |
|                                   | SLTorf257Sn                          | 27065-TTAGGAGCTAATGAAATAGCTGCTAGTA-27092     | EF462198                                       | This study                         |            |
|                                   | SLTorf257Sp                          | 27093-CTCTAAAGAGCAATATAAGCGTTTC-27118        | EF462198                                       | (3)                                |            |
|                                   | SLTorf257Ab                          | 27142-CTTTAAATCTTCTGGGACGTTCTC-27119         | EF462198                                       | (3)                                |            |
| φN315 SA1801                      | SA1801Ab                             | 5235-CAATCAGCGGTCGAGAAT-5253                 | EF462197                                       | (3)                                |            |
|                                   | SA1801Ap                             | 5279-GAGTCTTAACCTCTAATGCTTGATGA-5254         | EF462197                                       | (3)                                |            |
|                                   | SA1801An                             | 5305-CATTCTTCAAACATTTTTGTATG-5280            | EF462197                                       | (3)                                |            |
|                                   | SA1801Sn                             | 5687-CGCAGATTGTTGAGTGGTTA-5707               | EF462197                                       | (3)                                |            |
|                                   | SA1801Sp                             | 5708-CGTCAAACCGGATTCCTATTTAAA-5731           | EF462197                                       | (3)                                |            |
|                                   | SA1801Ab                             | 5751-TTATAATCCACACCTTGCG-5732                | EF462197                                       | (3)                                |            |
| φMu50A SAV1974                    | SAV1974Sb                            | 2110912-GCCACAAGAAAAGGAGTG-2110894           | BA000017                                       | (3)                                |            |
|                                   | SAV1974Ap                            | 2110869-TGCTTACAGCTACATCTGTTTTGAT-2110893    | BA000017                                       | (3)                                |            |
|                                   | SAV1974An                            | 2110813-CGTTTTACTACTACCACTACGG-2110837       | BA000017                                       | This study                         |            |
|                                   | SAV1974Sp                            | 2110719-GATATGAGTAACCTTTGGTCGGAGTC-2110695   | BA000017                                       | (3)                                |            |
|                                   | SAV1974Ab                            | 2110673-ATACCTTCCATCTATCCAGCAG-2110694       | BA000017                                       | (3)                                |            |
| φSLT ORF 182                      | SLTorf182Sb                          | 1080396-CATTAAGGTTATATCAAGGTTTTAGAGG-1080424 | CP000736                                       | This study                         |            |
|                                   | SLTorf182Ap                          | 1080460-CTTCAAAGAAATATGACTACTCAATTTG-1080431 | CP000736                                       | This study                         |            |
|                                   | SLTorf182Sp                          | 1080493-CAACCTGTTACCTACTAACCAAAA-1080518     | CP000736                                       | (3)                                |            |
|                                   | SLTorf182Ab                          | 1080540-GTTTGCTACTATGTCGCAACT-1080519        | CP000736                                       | (3)                                |            |
| <i>ccrAB</i>                      | 1Sb                                  | 24838-CAATCAAAACCTATATCATCAATCAGTACG-24867   | AB033763                                       | (1)                                |            |
|                                   | ccrA1Ap                              | 24890-TGGAAAGCTTTTCGAATTTGAT-24869           | AB033763                                       | (1)                                |            |
|                                   | 1An                                  | 24944-TCATCAATATAGGGGTACAACATGTT-24911       | AB033763                                       | (1)                                |            |
|                                   | βc1Sn                                | 25421-CAGGCAAGTTAATGCTCCAG-25440             | AB033763                                       | (1)                                |            |
|                                   | ccrB1Sp                              | 25497-CGGACAACGTCAAAGAGC-25514               | AB033763                                       | (1)                                |            |
|                                   | βcAb                                 | 25539-ATTGCCTTGATAATAGCC-25522               | AB033763                                       | This study                         |            |
|                                   | <i>ccrC</i>                          | FSb                                          | 16318-AAACGTCTATTACAAGATGTTAAGGATAAT-16347     | AB121219                           | (1)        |
|                                   |                                      | ccrCAp                                       | 16375-ATTTCCAACCTAATACCATTTTCGATT-16350        | AB121219                           | (1)        |
|                                   |                                      | Ran                                          | 16430-TTGAATTCATGAATAATTTAAACACGT-16403        | AB121219                           | (1)        |
|                                   |                                      | FaSn                                         | 16741-ACGACAAATCTAAATCAAAAAGGA-16764           | AB121219                           | (1)        |
|                                   |                                      | ccrCSp                                       | 16792-TCAGTGTTTGGCGTGAAT-16810                 | AB121219                           | (1)        |
|                                   |                                      | RAb                                          | 16838-GCCTTTATAGACTGGATTATTTCAAAATA-16812      | AB121219                           | (1)        |
|                                   | <i>mecR1</i>                         | mI6Sb                                        | 42866-CATAACTCCCATTCTGCAGATG-42888             | D86934                             | (1)        |
|                                   |                                      | mecR1Ap                                      | 42924-GAGTTAATATAATGGATAATAAAACGTATGAAAT-42891 | D86934                             | (1)        |
|                                   |                                      | mecR1Sp                                      | 42927-TTCTTTTAAAATACGCTCAGAAATTT-42953         | D86934                             | This study |
| SCCmec elements                   | mA7Ab                                | 42971-ATGGCGAAAAAGCACAAAC-42954              | D86934                                         | (1)                                |            |
|                                   | E007                                 | 1a3Sb                                        | 5277-TTTTAGGAGGTAATCTCCTTGATG-5300             | AB033763                           | (1)        |
|                                   |                                      | E007Ap                                       | 5328-TTTATAACATTGCTCTTTACCTCAG-5301            | AB033763                           | (1)        |
|                                   |                                      | E007Sp                                       | 5387-AATAAGCATACATGGAGACGTTTT-5410             | AB033763                           | (1)        |
|                                   | CQ002                                | 1a4Ab                                        | 5431-TTTGCGTTTGCATCTACC-5411                   | AB033763                           | (1)        |
|                                   |                                      | 4a1Sb                                        | 4726-TTGAATGCCCTCCATGAATAAAAT-4750             | AB063172                           | (1)        |
|                                   |                                      | CQ002Ap                                      | 4777-CGGGTAATATGAGAATAAATAAAGAAG-4751          | AB063172                           | (1)        |
|                                   | <i>cadB</i>                          | 4a1An                                        | 4844-GCGTATTATGATACTAAGCAAAGTATTAATAAG-4811    | AB063172                           | (1)        |
|                                   |                                      | 4a3Sn                                        | 5079-TTGAATCCTGGGAATCTATCACT-5102              | AB063172                           | (1)        |
|                                   |                                      | CQ002Sp                                      | 5133-ACATGCTGTAGTCATTTTATACTGTTG-5160          | AB063172                           | (1)        |
|                                   |                                      | 4a3Ab                                        | 5183-AGCATATAGAAAAGATAGAAGTTGCAAGA-5161        | AB063172                           | (1)        |
|                                   |                                      | cad4Sb                                       | 16107-ATTGCGATTCTTTCCGATATGG-16128             | AB037671                           | (1)        |
|                                   |                                      | cadBAp                                       | 16156-CTATTTAATGCTACCAAAATAGTGGCTC-16129       | AB037671                           | (1)        |
|                                   | <i>cadB</i>                          | cad4An                                       | 16213-TTCGTAATGTCACACATATAGTACTT-16186         | AB037671                           | (1)        |
|                                   |                                      | mN5Sn                                        | 17537-CCCTCCCATATATATAACAAGTTTAGGA-17564       | AB037671                           | (1)        |
| Z023Sp                            |                                      | 17594-TGATCCACTAAGTGTACTGAAAAACTTG-17623     | AB037671                                       | (1)                                |            |
| mN5Ab                             |                                      | 17646-TTGCTTGGGACTTACTCTAGT-17624            | AB037671                                       | (1)                                |            |

**Supplementary Table.** Oligonucleotides used in the study. Oligonucleotides ending in b are biotinylated primers, those ending in p are amine-labelled probes and those ending in n are unlabelled primers. Unlabelled oligonucleotides were used as internal primers for targets where the amplicon would otherwise be greater than 200bp (amplicons larger than this lead to weak probe signals). A: antisense, S: Sense. Numbers flanking the sequence indicate the location of the primer on the Genbank reference sequence.

## REFERENCES

1. **Cai, L., F. Kong, Q. Wang, H. Wang, M. Xiao, V. Sintchenko, and G. L. Gilbert.** 2009. A new multiplex PCR-based reverse line-blot hybridization (mPCR/RLB) assay for rapid staphylococcal cassette chromosome mec (SCCmec) typing. *J Med Microbiol* **58**:1045-1057.
2. **Cai, Y., F. Kong, Q. Wang, Z. Tong, V. Sintchenko, X. Zeng, and G. L. Gilbert.** 2007. Comparison of single and multilocus sequence typing and toxin gene profiling for characterisation of methicillin resistant *Staphylococcus aureus* (MRSA). *J Clin Microbiol* **45**:3302-3308.
3. **O'Sullivan, M. V., F. Kong, V. Sintchenko, and G. L. Gilbert.** 2010. Rapid identification of methicillin-resistant *Staphylococcus aureus* transmission in hospitals by use of phage-derived open reading frame typing enhanced by multiplex PCR and reverse line blot assay. *J Clin Microbiol* **48**:2741-2748.
